# Supplementary material for: Self-assembled three-dimensional architectures of VO2:Yb3+,Er3+ controlled synthesis and dual-power dependent luminescence properties
Source: Royal Society of Chemistry journal article supplement (doi:10.1039/c8nj02681e), 2018-01-01
Supplement: c8nj02681e1.pdf [file c8nj02681e1.pdf]

## Supporting Information

### Self-Assembled Three-Dimensional Architectures of $\text{VO}_2:\text{Yb}^{3+},\text{Er}^{3+}$ Controlled Synthesis and Dual-power Dependent Luminescence Properties

Wei Zheng , Rui Wang \*, Yuemei Li , Yanling Xu , and Baoyu Su

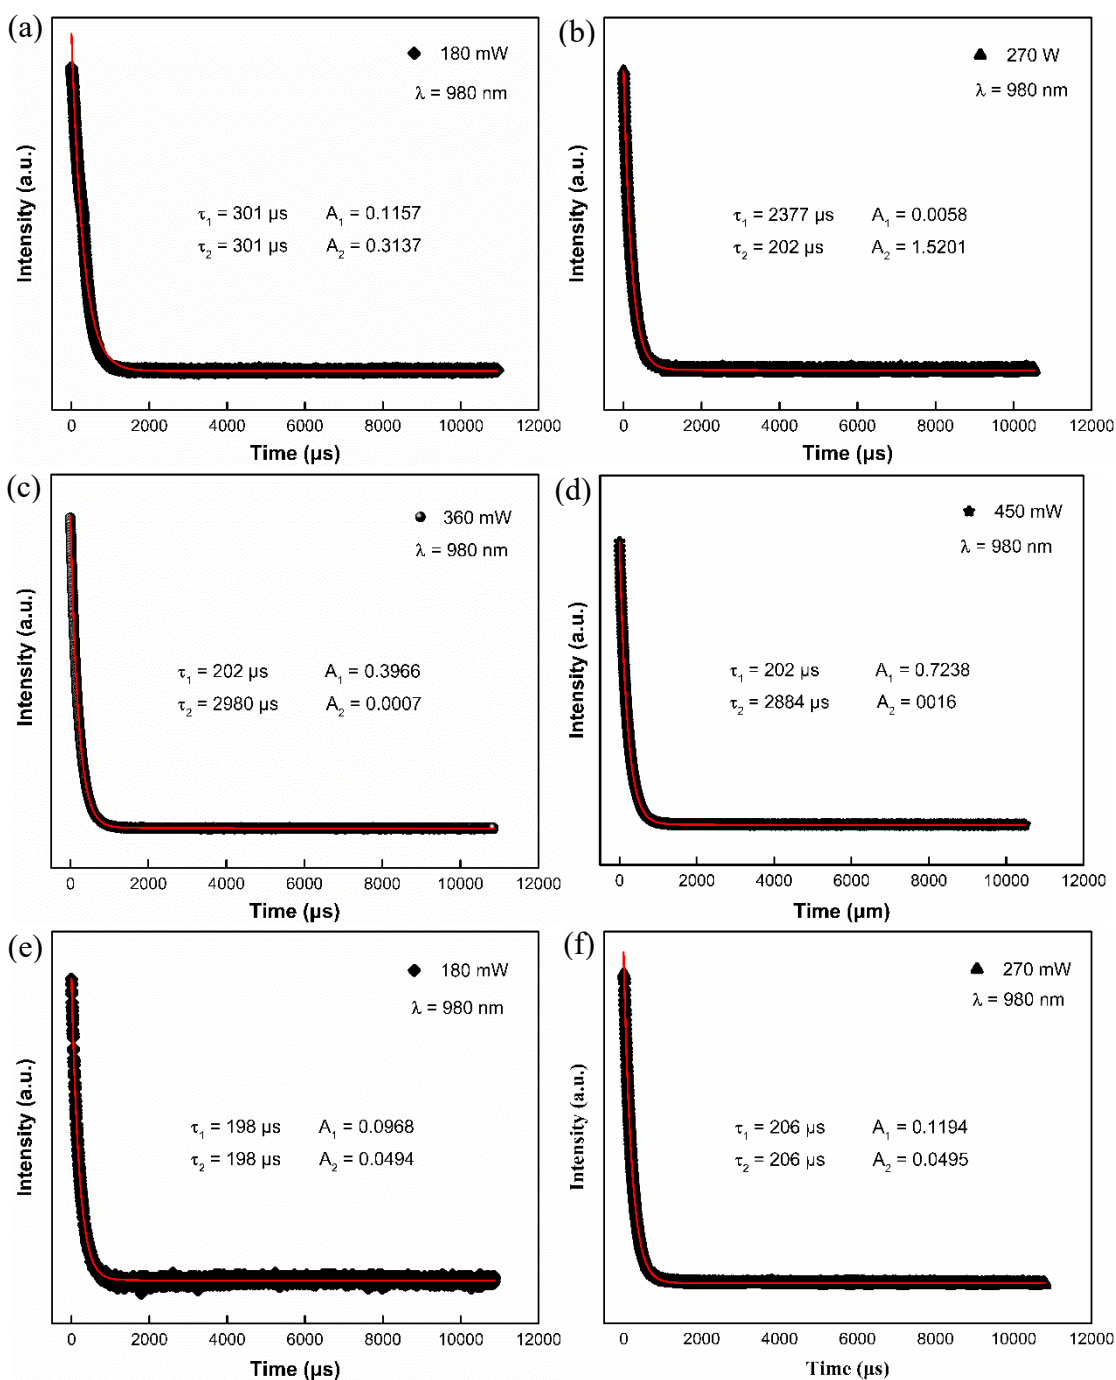

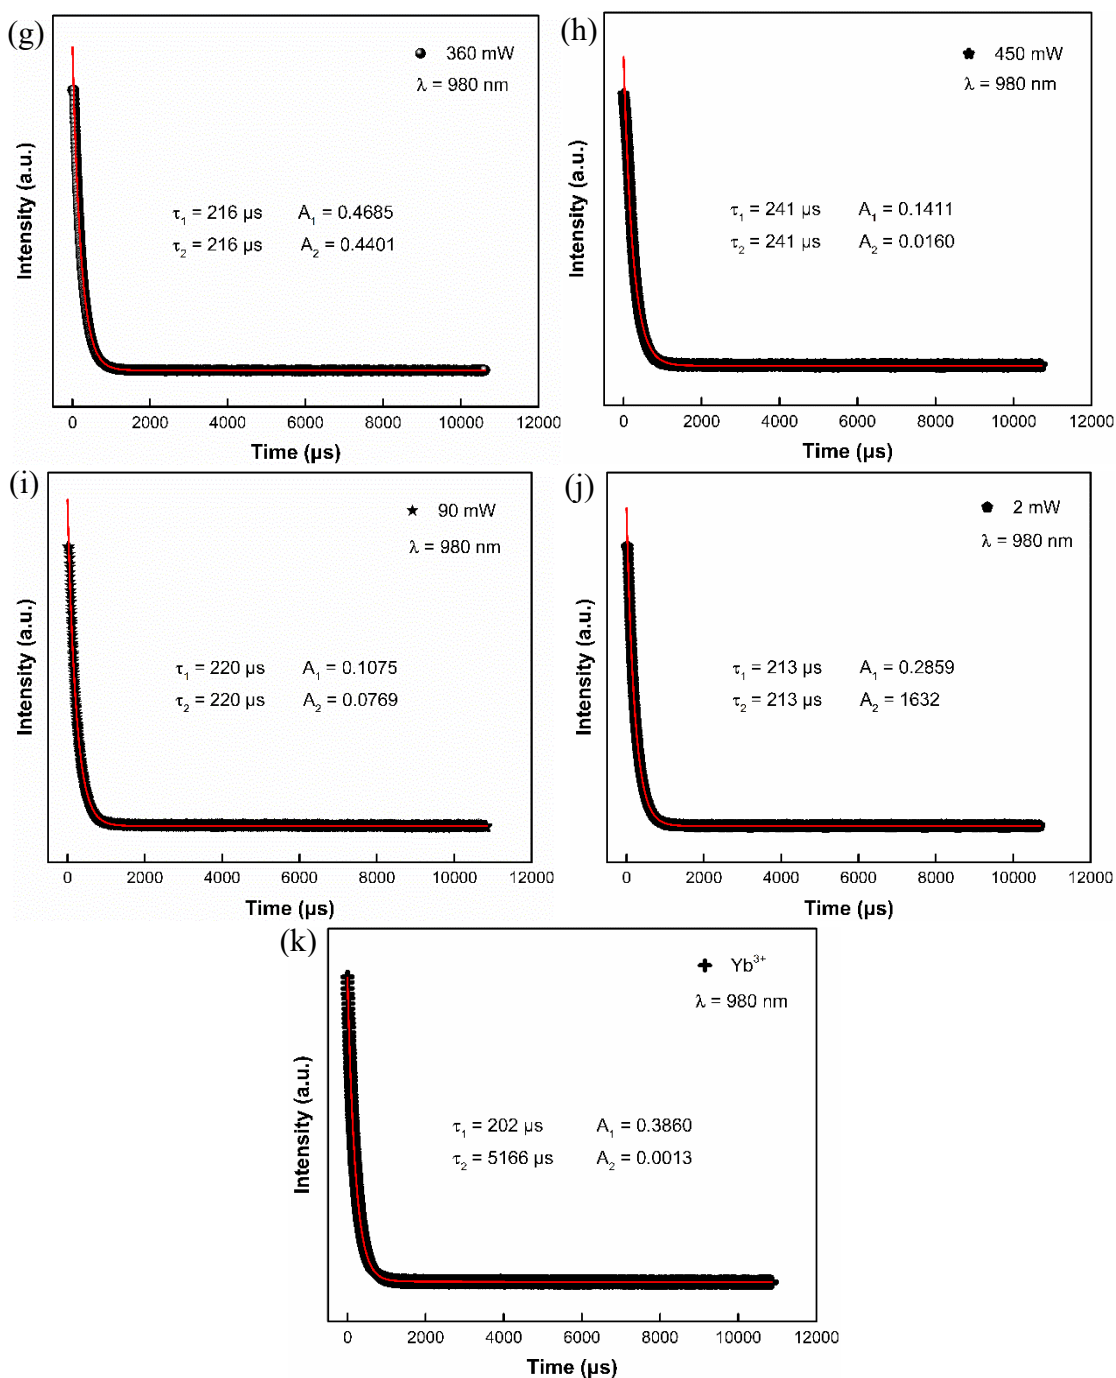

**Fig. 1** (a-d) Luminescence decay curves of 980 nm in  $\text{VO}_2: \text{Er}^{3+}, \text{Yb}^{3+}$  nanocrystals under pump power 180, 270, 360, and 450 mW, respectively. (e-j) Luminescence decay curves of 980 nm in  $\text{VO}_2: \text{Er}^{3+}, \text{Yb}^{3+}$  nanocrystals under 180, 270, 360, 450, 90, and 2 mW via higher power-sensitized treatment; (k) Luminescence decay curves of 980 nm in  $\text{VO}_2: \text{Yb}^{3+}$  nanocrystals.
